# Supplementary material for: P2-10-7 子宮頸部大細胞神経内分泌癌と腸型粘液性腺癌とが合併した一例(Group 62 子宮頸部腫瘍・症例,一般演題,公益社団法人日本産科婦人科学会第65回学術講演会)
Source: Royal Society of Chemistry journal article supplement (doi:10.1039/c3dt50266j), 2013-02-01
Supplement: c3dt50266j.pdf [file c3dt50266j.pdf]

## List of Electronic Supplementary Information

# Syntheses, Photophysical Properties, and Reactivities of Novel Bichromophoric Pd Complexes Composed of Ru(II)–Polypyridyl and Naphthyl Moieties

*Kei Murata,<sup>a</sup> Mizuki Araki,<sup>a</sup> Akiko Inagaki,\*<sup>a,b,c</sup> Munetaka Akita.\*<sup>a</sup>*

<sup>a</sup>Chemical Resources Laboratory, Tokyo Institute of Technology, R1-27, 4259 Nagatsuta Midori-ku Yokohama 226-8503, Japan

<sup>b</sup>Precursory Research for Embryonic Science and Technology, Japan Science and Technology Agency (JST-PRESTO),  
4-1-8 Honcho, Kawaguchi, Saitama 332-0012, Japan

<sup>c</sup>Department of Chemistry, Faculty of Science and Engineering, Tokyo Metropolitan University, 1-1 Minami Osawa, Hachioji,  
Tokyo 192-0397, Japan

|                                                                                                                                                                                                    |    |
|----------------------------------------------------------------------------------------------------------------------------------------------------------------------------------------------------|----|
| Figure S1. CV Charts of mononuclear Ru complexes.                                                                                                                                                  | S2 |
| Figure S2. CV Charts of dinuclear Ru-Pd complexes.                                                                                                                                                 | S3 |
| Figure S3. <sup>1</sup> H NMR spectra of <b>1</b> (300 MHz, CD <sub>3</sub> CN, r.t) (a) mixture of isomers ( <b>A</b> + <b>B</b> + <b>C</b> ) (b) single isomer ( <b>B</b> or <b>C</b> ) *toluene | S4 |

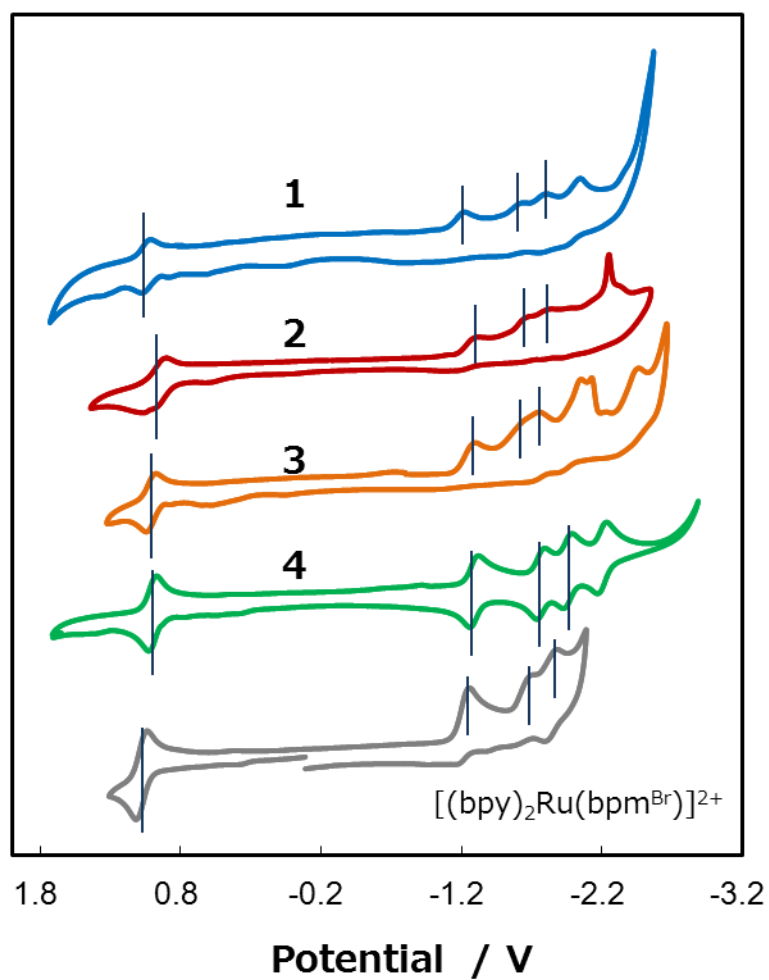

**Figure S1.** CV Charts of mononuclear Ru complexes (r.t., in  $CH_3CN$  with 0.1 M  $[Bu_4N]BF_4$  V vs E (Fc/Fc<sup>+</sup>).

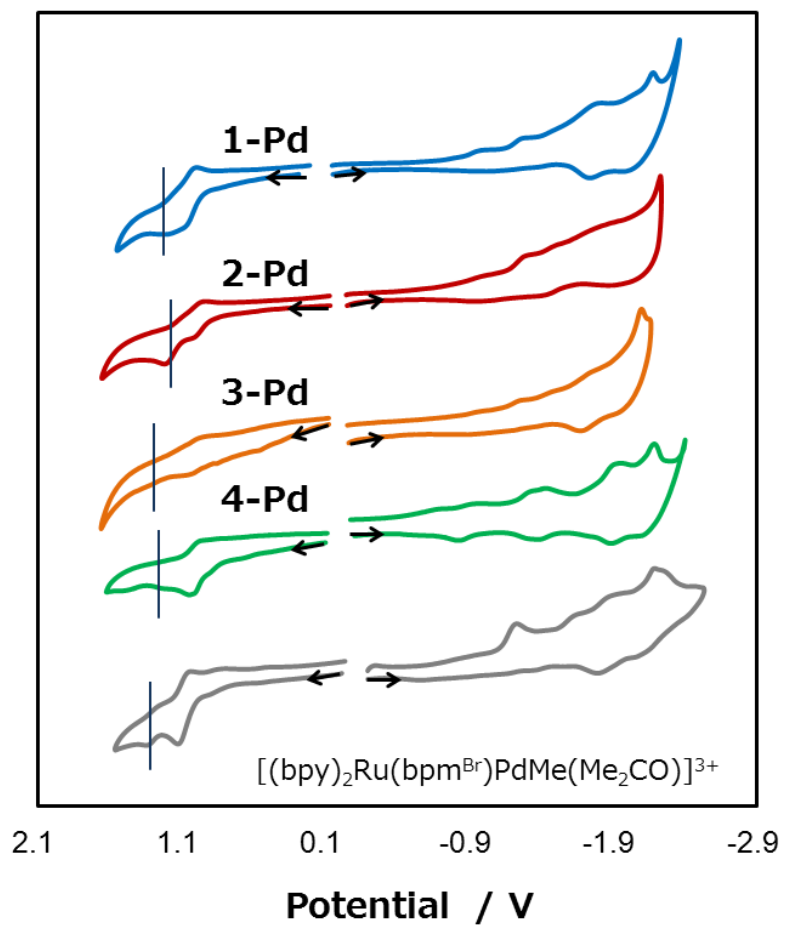

**Figure S2.** CV Charts of dinuclear Ru-Pd complexes (r.t., in  $CH_3CN$  with 0.1 M  $[Bu_4N]BF_4$  V vs  $E(Fc/Fc^+)$ ).

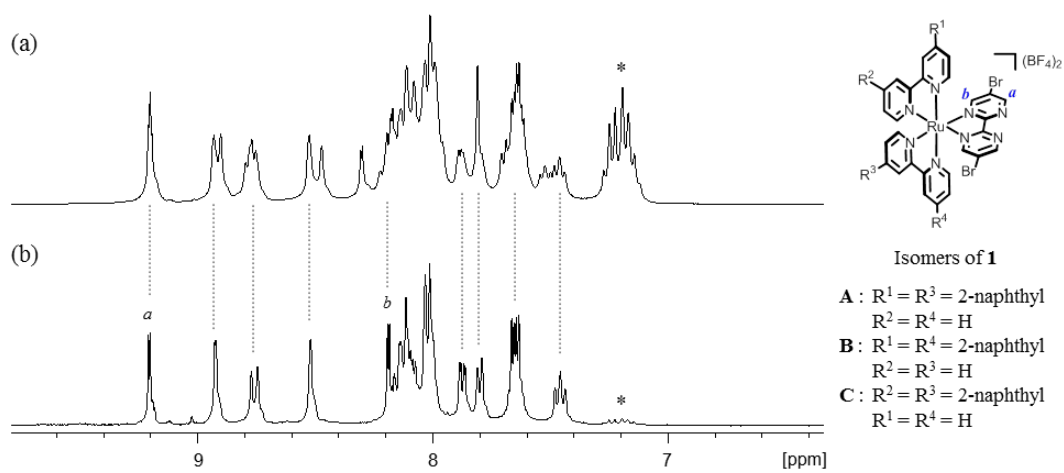

**Figure S3** <sup>1</sup>H NMR spectra of **1** (300 MHz, CD<sub>3</sub>CN, r.t) (a) mixture of isomers (**A** + **B** + **C**)  
(b) single isomer (**B** or **C**) \*toluene
